# Supplementary material for: Greener and expeditious one-pot synthesis of dihydropyrimidinone derivatives using non-commercial β-ketoesters via the Biginelli reaction
Source: Royal Society of Chemistry journal article supplement (doi:10.1039/c4ra06587e), 2014-01-01

## **Supplementary Information**

### **Greener and expeditious one-pot synthesis of dihydropyrimidinone derivatives using non-commercial $\beta$ -ketoesters *via* Biginelli reaction**

**G. B. Dharma Rao,\* B. Anjaneyulu, M. P. Kaushik\***

*\* Discovery Centre, Process Technology Development Division, Defence R. & D. Establishment, Jhansi Road, Gwalior – 474002, M.P., India . Tel.:+91-751-2343972; fax: +91-751-2340042. E-mail address: [gbdharmarao@gmail.com](mailto:gbdharmarao@gmail.com) (G.B. Dharma Rao), [mpkaushik@rediffmail.com](mailto:mpkaushik@rediffmail.com) (M.P. Kaushik).*

#### **Contents**

|           |                                                                                              |               |
|-----------|----------------------------------------------------------------------------------------------|---------------|
| <b>1.</b> | <b>General details</b>                                                                       | <b>S2</b>     |
| <b>2.</b> | <b>Experimental procedure</b>                                                                | <b>S2</b>     |
| <b>3.</b> | <b>Spectroscopic characterization data</b>                                                   | <b>S3-S4</b>  |
| <b>4.</b> | <b>Selected copies of <math>^1\text{H}</math> and <math>^{13}\text{C}</math> NMR spectra</b> | <b>S5-S16</b> |

## 1. General details

Melting points were determined with open capillary tube on a Gallenkamp (variable heater) melting point apparatus and are uncorrected. The  $^1\text{H}$  and  $^{13}\text{C}$  NMR spectra of the synthesized compounds were recorded at 400 MHz and 100 MHz respectively using Bruker AVANCE 400 MHz NMR spectrometer in  $\text{DMSO-d}_6$  solvent and the chemical shifts are expressed in  $\delta$  (ppm) relative to TMS as internal standard and coupling constants ( $J$ ) in Hz. Spin multiplicities are shown as s (singlet), d (doublet), t (triplet) and m (multiplet). Mass analyses were performed on quadrupole-time of flight (Q-Tof) mass spectrometer (Micromass, USA) using electron spray ionization (ESI) in positive mode. TLC analyses were performed using precoated aluminium sheets with silica gel 60 F<sub>254</sub>.

## 2. Experimental Procedure

An oven-dried 25ml round bottomed flask equipped with a refluxed condenser was charged with arylaldehyde (1.0 mmol) and urea (1.2 mmol). The precursors were finely powdered and mixed together and allowed to mechanical stirring for 30min at room temperature. The *tert*-butyl  $\beta$ -ketoester (1.0 mmol) and an alcohol (1.5 mmol) were added to above mixture subsequently. The resulting reaction mixture was heated for 3hr at 110°C (oil bath) with constant stirring till the reaction was completed. The progress of reaction was monitored by TLC. After completion of reaction as indicated on TLC, the contents of reaction mixture was cooled to room temperature and the crude reaction mixture was crushed and washed with chilled water (15ml x 3), filtered and dried under vacuum. For analytically pure products, the final solid mass was washed with diethyl ether (10ml x 3) to remove the un-reacted reactants to afford the pure product in 85-94% yield.

### 3. Spectroscopic characterization data

#### **Isopentyl-4-(4-methoxyphenyl)-6-methyl-2-oxo-1,2,3,4-tetrahydropyrimidine-5-carboxylate**

(Table 1, entry 1): White colored solid, 148-150°C, IR ( $\nu_{\text{Max}}$ ): 782, 836, 1095, 1226, 1513, 1654, 1726, 2958, 3116, 3246. <sup>1</sup>H-NMR (400MHz, DMSO-d<sub>6</sub>):  $\delta$  0.752 (d, 6H), 1.336-1.379 (m, 2H), 1.398-1.447 (m, 1H), 2.202 (s, 3H), 3.716 (s, 3H), 3.921-4.002 (m, 2H), 5.078 (d, 1H), 6.857 (d,  $J$  = 8.4 Hz, 2H), 7.117 (d,  $J$  = 8.4 Hz, 2H), 7.618 (s, 1H), 9.117 (s, 1H). <sup>13</sup>C NMR (DMSO-d<sub>6</sub>): 17.663, 22.035, 22.209, 24.307, 36.899, 53.352, 55.015, 61.426, 99.354, 113.653, 127.333, 136.920, 148.141, 152.011, 158.441, 165.322. ESI-MS: 333.520 [M+1].

#### **Prop-2-ynyl-4-(4-ethylphenyl)-6-methyl-2-oxo-1,2,3,4-tetrahydropyrimidine-5-carboxylate**

(Table 1, entry 8): White colored solid, M. P. 150-152°C, IR ( $\nu_{\text{Max}}$ ): 683, 790, 1083, 1224, 1511, 1680, 1713, 2967, 3250, 3293. <sup>1</sup>H-NMR (400MHz, DMSO-d<sub>6</sub>):  $\delta$  1.130 (t,  $J$  = 7.6 Hz, 3H), 2.252 (s, 3H), 2.530-2.587 (q,  $J$  = 7.6Hz, 2H), 3.450 (t, 1H), 4.632 (d, 2H), 5.0105(d, 1H), 7.148 (s, 4H), 7.739 (s, 1H), 9.273 (s, 1H). <sup>13</sup>C NMR (DMSO-d<sub>6</sub>): 15.524, 17.847, 27.737, 50.893, 53.292, 77.104, 78.749, 98.545, 126.039, 127.715, 141.830, 142.774, 149.546, 152.078, 164.461. ESI-MS:- 299.68 [M+1].

#### **Prop-2-ynyl-4-(4-chlorophenyl)-6-methyl-2-oxo-1,2,3,4-tetrahydropyrimidine-5-carboxylate**

(Table 1, entry 9): Pale yellow colored solid, M. P. 174-176°C, IR ( $\nu_{\text{Max}}$ ): 679, 789, 847, 1081, 1239, 1374, 1490, 1726, 2947, 3121, 3251. <sup>1</sup>H-NMR (400MHz, DMSO-d<sub>6</sub>):  $\delta$  2.263 (s, 3H), 3.445 (t, 1H), 4.634 (t, 2H), 5.138 (d, 1H), 7.246 (d,  $J$  = 8.4 Hz, 2H), 7.376 (d,  $J$  = 8.4 Hz, 2H), 7.821 (s, 1H). <sup>13</sup>C NMR (DMSO-d<sub>6</sub>): 17.895, 50.952, 53.132, 77.142, 78.684, 97.960, 128.059, 128.378, 131.852, 143.415, 150.082, 151.808, 164.309. ESI-MS:- 305.578 [M+1].

#### **Prop-2-ynyl-4-(3-chlorophenyl)-6-methyl-2-oxo-1,2,3,4-tetrahydropyrimidine-5-carboxylate**

(Table 1, entry 10): Yellow colored solid, M. P. 156-158°C, IR ( $\nu_{\text{Max}}$ ): 691, 786, 1090, 1227, 1430, 1648, 1710, 2930, 3247, 3302. <sup>1</sup>H-NMR (400MHz, DMSO-d<sub>6</sub>):  $\delta$  2.27 (s, 3H), 3.447 (t, 1H), 4.645 (d, 2H), 5.150 (d, 1H), 7.197 (d, 1H), 7.256 (s, 1H), 7.309-7.350 (m, 1H), 7.369 (d, 1H), 7.851 (s, 1H), 9.396 (s, 1H). <sup>13</sup>C NMR (DMSO-d<sub>6</sub>): 17.918, 51.021, 53.292, 77.179, 78.641, 97.766, 124.765, 126.115, 127.311, 130.457, 133.003, 146.847, 150.330, 151.863, 159.679, 164.298. ESI-MS: 304.241 [M+1].

#### **Prop-2-ynyl-4-(4-fluorophenyl)-6-methyl-2-oxo-1,2,3,4-tetrahydropyrimidine-5-carboxylate**

(Table 1, entry 11): Cream colored solid: M. P. 172-174°C, IR ( $\nu_{\text{Max}}$ ): 795, 851, 1078, 1240, 1462, 1675, 1724, 2950, 3270, 3291. <sup>1</sup>H-NMR (400MHz, DMSO-d<sub>6</sub>):  $\delta$  2.264 (s, 3H), 3.439 (t, 1H), 4.631 (d, 2H), 5.141 (d, 1H), 7.120 (d, 2H), 7.252 (d, 2H), 7.801 (s, 1H), 9.342 (s, 1H). <sup>13</sup>C NMR (DMSO-d<sub>6</sub>): 17.868, 50.915, 53.055, 77.094, 78.698, 98.273, 114.993, 115.205, 128.088, 128.169, 140.728, 140.757, 149.878, 151.863, 159.616, 160.120, 162.536, 164.357. ESI-MS: 289.560 [M+1].

#### **Prop-2-ynyl-6-methyl-2-oxo-4-(4-(trifluoromethyl)phenyl)-1,2,3,4-tetrahydropyrimidine-5-carboxylate (Table 1, entry 12):**

White colored solid: M. P. 166-168°C, IR ( $\nu_{\text{Max}}$ ): 761, 832, 920, 1077, 1237, 1334, 1443, 1641, 1712, 3282, 3341. <sup>1</sup>H-NMR (400MHz, DMSO-d<sub>6</sub>):  $\delta$  2.276 (s, 3H), 3.447 (t, 1H), 4.642 (d, 2H), 5.229 (d, 1H), 7.456 (d,  $J$  = 8.0 Hz, 2H), 7.694 (d,  $J$  = 8.4 Hz, 2H), 7.896 (s, 1H), 9.426 (s, 1H). <sup>13</sup>C NMR (DMSO-d<sub>6</sub>): 17.955, 51.034, 53.515, 77.164, 78.662, 97.707, 122.858, 125.391, 125.428, 125.466, 125.499, 125.561, 127.071, 127.891, 128.066, 128.205, 148.938, 150.460, 151.842, 159.882, 164.311. ESI-MS: 339.521 [M+1].

**Prop-2-ynyl-6-methyl-2-oxo-4-phenyl-1,2,3,4-tetrahydropyrimidine-5-carboxylate (Table 1, entry 13):** Pale yellow colored solid: 182-184°C, IR ( $\nu_{\text{Max}}$ ): 662, 696, 793, 1083, 1291, 1644, 1704,

2939, 3116, 3291. <sup>1</sup>H-NMR (400MHz, DMSO-d<sub>6</sub>): δ 2.246 (s, 3H), 3.445 (t, 1H), 4.637 (d, 2H), 5.143 (d, 1H), 7.225-7.339 (m, 5H), 7.795 (s, 1H), 9.312 (s, 1H). <sup>13</sup>C NMR (DMSO-d<sub>6</sub>): 17.913, 50.944, 53.702, 77.063, 78.750, 98.485, 126.146, 127.307, 128.402, 144.515, 149.739, 152.128, 164.485. ESI-MS: 271.751 [M+1].

**Prop-2-ynyl-6-methyl-4-(4-nitrophenyl)-2-oxo-1,2,3,4-tetrahydropyrimidine-5-carboxylate**

**(Table 1, entry 14):** White colored solid: 180-182°C, IR (ν<sub>Max</sub>): 698, 787, 1227, 1350, 1648, 1729, 2928, 3239, 3372. <sup>1</sup>H-NMR (400MHz, DMSO-d<sub>6</sub>): δ 2.281 (s, 3H), 3.447 (t, 1H), 4.639 (s, 2H), 5.274 (d, 1H), 7.505 (d, *J* = 8.4 Hz, 2H), 7.950 (s, 1H), 8.194 (d, *J* = 8.4 Hz, 2H), 9.483 (s, 1H). <sup>13</sup>C NMR (DMSO-d<sub>6</sub>): 17.957, 51.037, 53.456, 77.203, 78.609, 97.334, 123.771, 125.460, 127.580, 128.074, 146.767, 150.722, 151.615, 151.662, 159.815, 164.186. ESI-MS: 316.109 [M+1].

**Prop-2-ynyl-6-methyl-4-(4-ethoxyphenyl)-2-oxo-1,2,3,4-tetrahydropyrimidine-5-carboxylate**

**(Table 1, entry 15):** Yellow colored solid, M. P. 196-198°C, IR (ν<sub>Max</sub>): 684, 792, 1087, 1222, 1512, 1644, 1708, 2936, 3246, 3299. <sup>1</sup>H-NMR (400MHz, DMSO-d<sub>6</sub>): δ 1.281 (t, *J* = 6.8 Hz, 3H), 2.253 (s, 3H), 3.442 (t, 1H), 3.957-3.991 (q, *J* = 6.8 Hz, 2H), 4.626 (t, 2H), 5.080 (d, 1H), 6.840 (d, *J* = 8.4 Hz, 2H), 7.128 (d, *J* = 8.8 Hz, 2H), 7.714 (s, 1H), 9.259 (s, 1H). <sup>13</sup>C NMR (DMSO-d<sub>6</sub>): 14.864, 18.124, 51.150, 53.317, 63.229, 77.354, 79.047, 99.003, 114.490, 127.545, 136.834, 149.657, 152.319, 158.016, 164.763. ESI-MS: 315.761 [M+1].

**Prop-2-ynyl-6-methyl-4-(3-fluorophenyl)-2-oxo-1,2,3,4-tetrahydropyrimidine-5-carboxylate**

**(Table 1, entry 16):** White colored solid: M. P. 184-186°C, IR (ν<sub>Max</sub>): 694, 789, 990, 1225, 1429, 1647, 1705, 2947, 3243, 3302. <sup>1</sup>H-NMR (400MHz, DMSO-d<sub>6</sub>): δ 2.270 (d, 3H), 3.442 (t, 1H), 4.650 (t, 2H), 5.162 (d, 1H), 6.994 (d, 1H), 7.086 (d, 2H), 7.351-7.406 (m, 1H), 7.840 (s, 1H), 9.366 (s, 1H). <sup>13</sup>C NMR (DMSO-d<sub>6</sub>): 17.904, 50.997, 53.240, 77.117, 78.676, 97.869, 112.812, 113.027, 113.991, 114.200, 122.085, 130.437, 130.518, 147.271, 147.330, 150.292, 151.911, 160.899, 163.325, 164.339. ESI-MS: 289.914 [M+1].

**2-(dimethylamino)ethyl-6-methyl-4-(4-ethoxyphenyl)-2-oxo-1,2,3,4-tetrahydropyrimidine-5-carboxylate (Table 1, entry 18):**

White colored solid: M. P. 178-180°C, IR = 3241, 3111, 2973, 2770, 1724, 1706, 1650, 1612, 1513, 1460, 1390, 1225, 1048, 955, 793. <sup>1</sup>H-NMR (400MHz, CDCl<sub>3</sub>) δ 1.374 (t, *J* = 6.8Hz, 3H), 2.167 (s, 6H), 2.300 (s, 3H), 2.423 (t, *J* = 6.0Hz, 2H), 3.990-3.973 (q, *J* = 6.8Hz, 2H), 4.075 (t, *J* = 6.0Hz, 2H), 5.311 (s, 1H), 5.660 (s, 1H), 6.765 (d, *J* = 8.4Hz, 2H), 7.176 (d, *J* = 8.4Hz, 2H), 8.016 (s, 1H). <sup>13</sup>C NMR (CDCl<sub>3</sub>) δ = 14.940, 18.857, 45.770, 55.309, 57.862, 62.006, 63.611, 101.613, 114.745, 127.944, 136.022, 146.375, 153.260, 158.808, 165.785, ESI-MS: *m/z* = 348 [M+1].

**2-(dimethylamino)ethyl-6-methyl-4-(4-methylphenyl)-2-oxo-1,2,3,4-tetrahydropyrimidine-5-carboxylate (Table 1, entry 19):**

White colored solid: M. P. 168-170°C, IR = 3245, 3118, 2949, 2825, 2775, 2361, 1709, 1651, 1462, 1287, 1225, 1102, 783, 501. <sup>1</sup>H-NMR (400MHz, CDCl<sub>3</sub>) δ 2.206 (s, 6H), 2.316 (s, 3H), 2.337 (s, 3H), 2.446 (t, *J* = 5.6Hz, 2H), 4.103 (t, *J* = 5.6Hz, 2H), 5.369 (s, 1H), 5.642 (s, 1H), 7.095 (d, *J* = 7.6Hz, 2H), 7.199 (d, *J* = 7.6Hz, 2H), 7.858 (s, 1H). <sup>13</sup>C NMR (CDCl<sub>3</sub>) δ = 18.845, 21.283, 45.808, 55.536, 57.926, 62.032, 101.434, 126.715, 129.561, 137.800, 141.073, 146.853, 153.675, 165.871. ESI-MS: *m/z* = 318.67 [M+1].

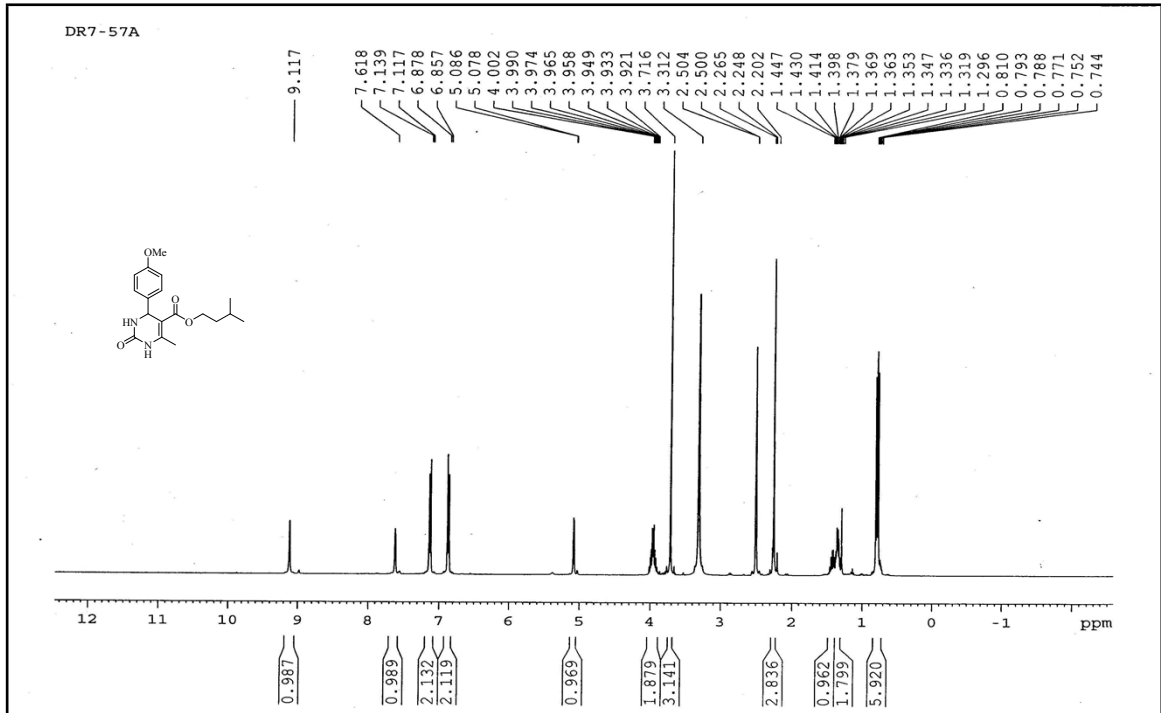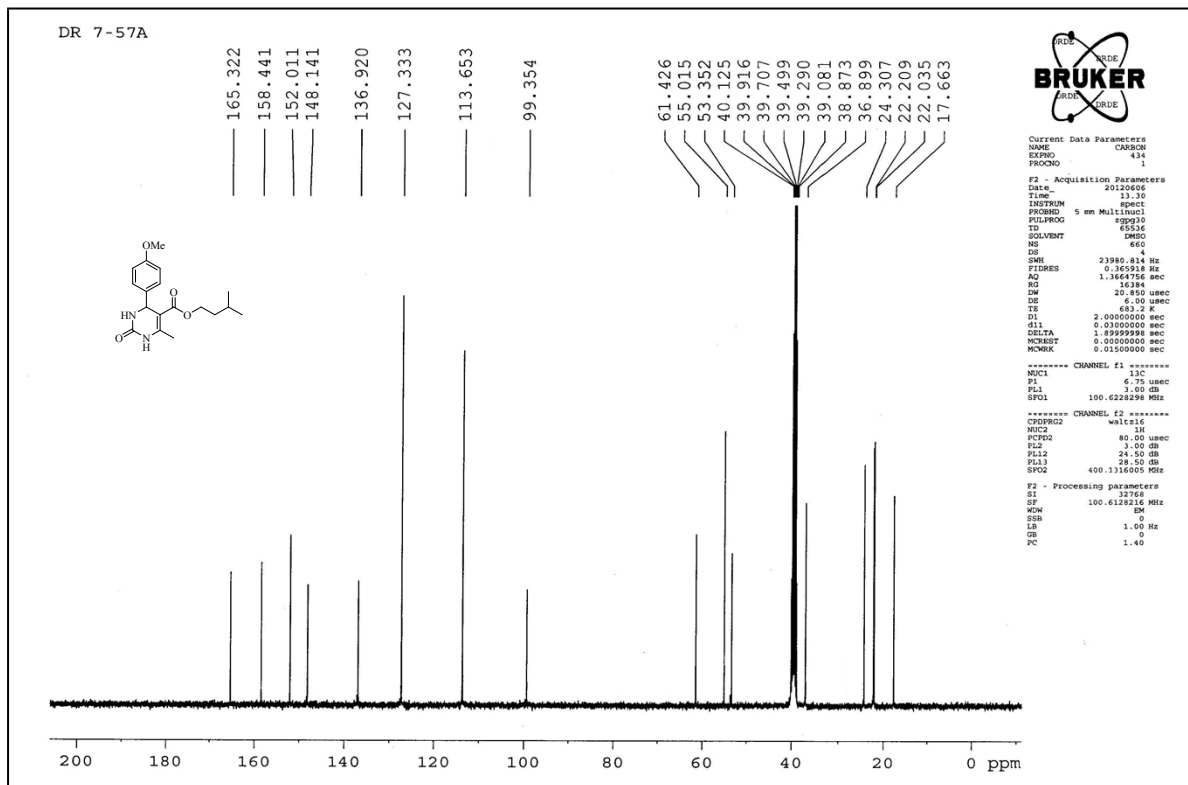

DR7-43A

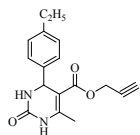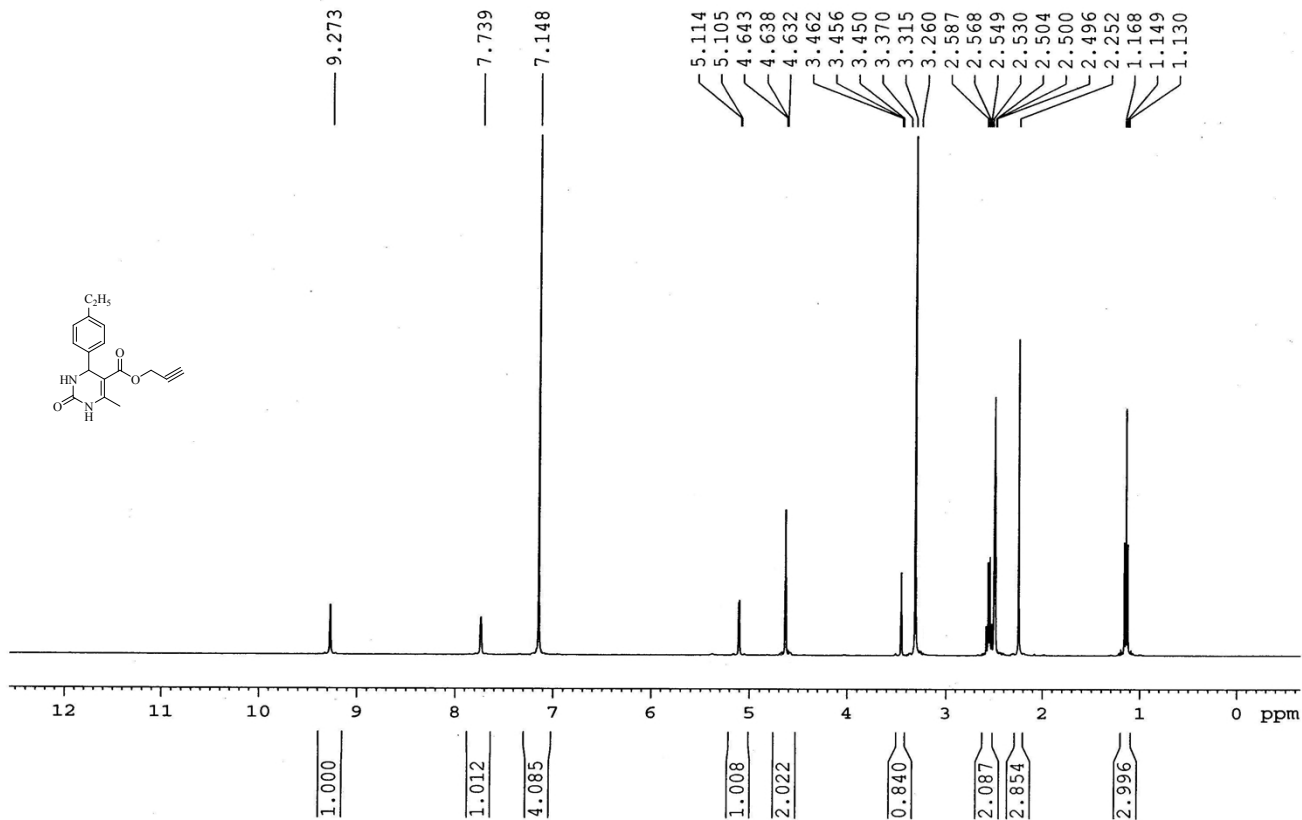

DR 7-43 A

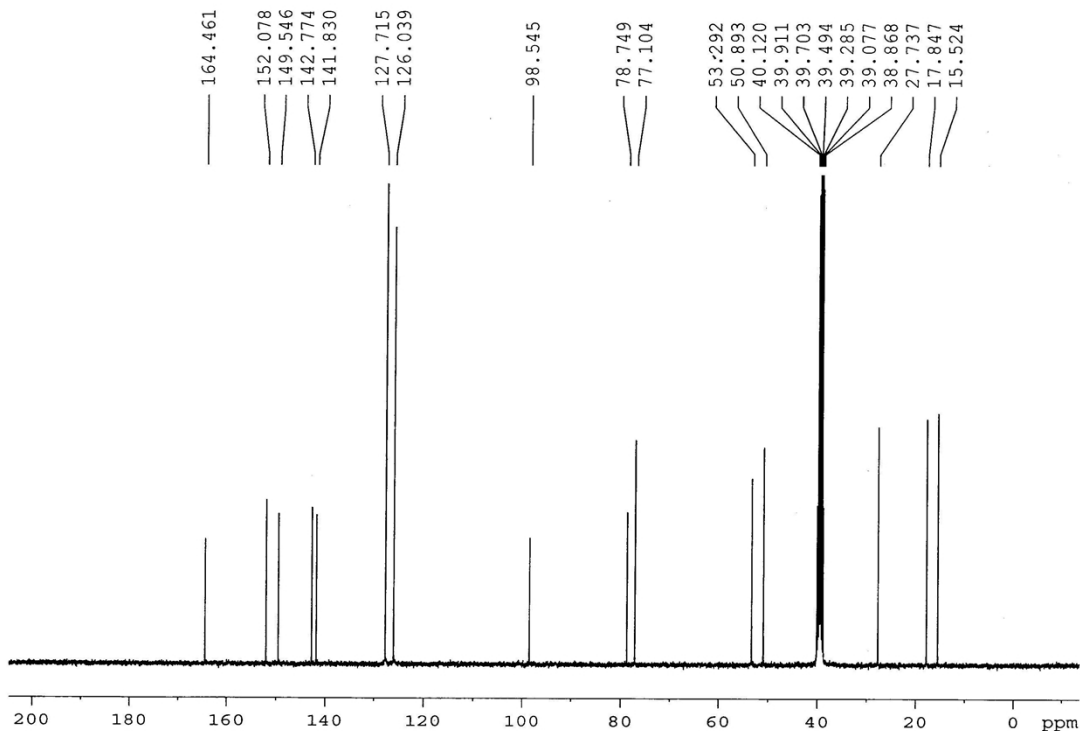

**BRUKER**

Current Data Parameters  
 NAME: CARBON  
 EXPNO: 413  
 PROCNO: 1

F2 - Acquisition Parameters  
 Date\_: 20120516  
 Time: 15:39  
 INSTRUM: spect  
 PROBHD: 5 mm Multisun1  
 PULPROG: zgpg30  
 ID: 65536  
 SOLVENT: DMSO  
 NS: 1634  
 DS: 4  
 SWH: 23980.814 Hz  
 FIDRES: 0.365918 Hz  
 AQ: 1.3664756 sec  
 RG: 1149.4  
 DW: 20.850 usec  
 DE: 6.00 usec  
 TE: 689.2 K  
 D1: 2.0000000 sec  
 d11: 0.0300000 sec  
 DELTA: 1.8999999 sec  
 MCREST: 0.0000000 sec  
 MCRNK: 0.0150000 sec

----- CHANNEL f1 -----  
 NUC1: 13C  
 P1: 6.70 usec  
 PL1: 3.00 dB  
 SFO1: 100.6228298 MHz

----- CHANNEL f2 -----  
 CPOBPR2: waltz16  
 NUC2: 1H  
 PCP2: 80.00 usec  
 PL2: 3.00 dB  
 PL12: 24.50 dB  
 PL13: 28.50 dB  
 SFO2: 400.1316005 MHz

F2 - Processing parameters  
 SI: 32768  
 SF: 100.6128223 MHz  
 MDW: EM  
 SB: 0  
 LB: 1.00 Hz  
 GB: 0  
 PC: 1.40

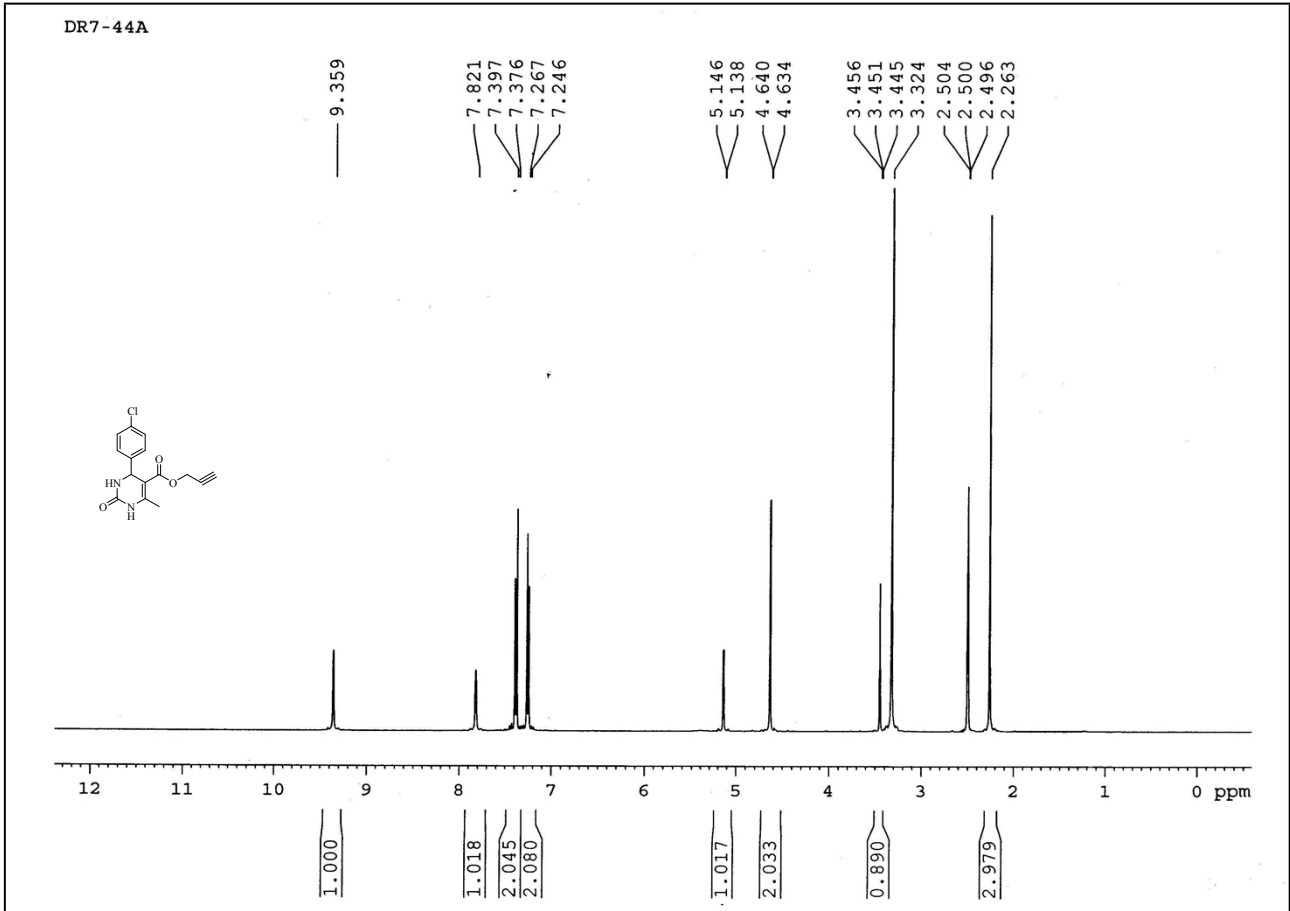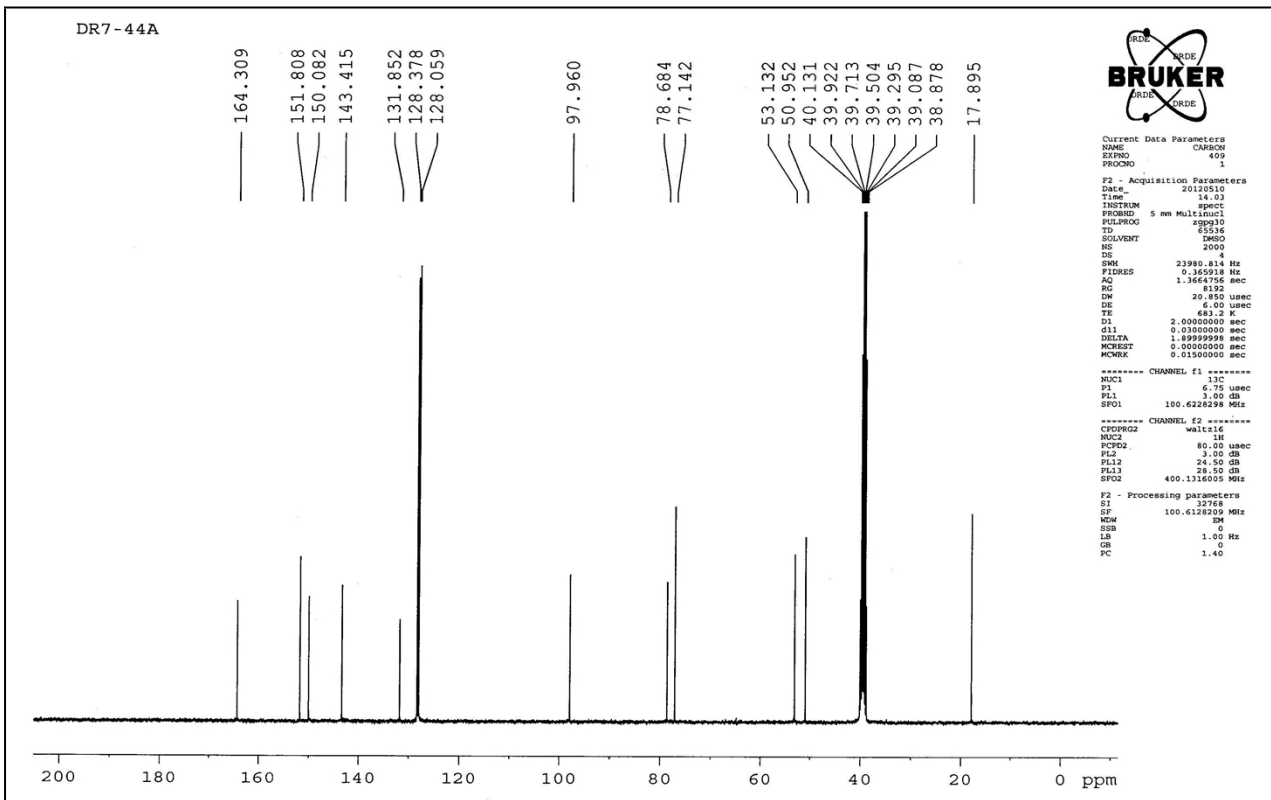

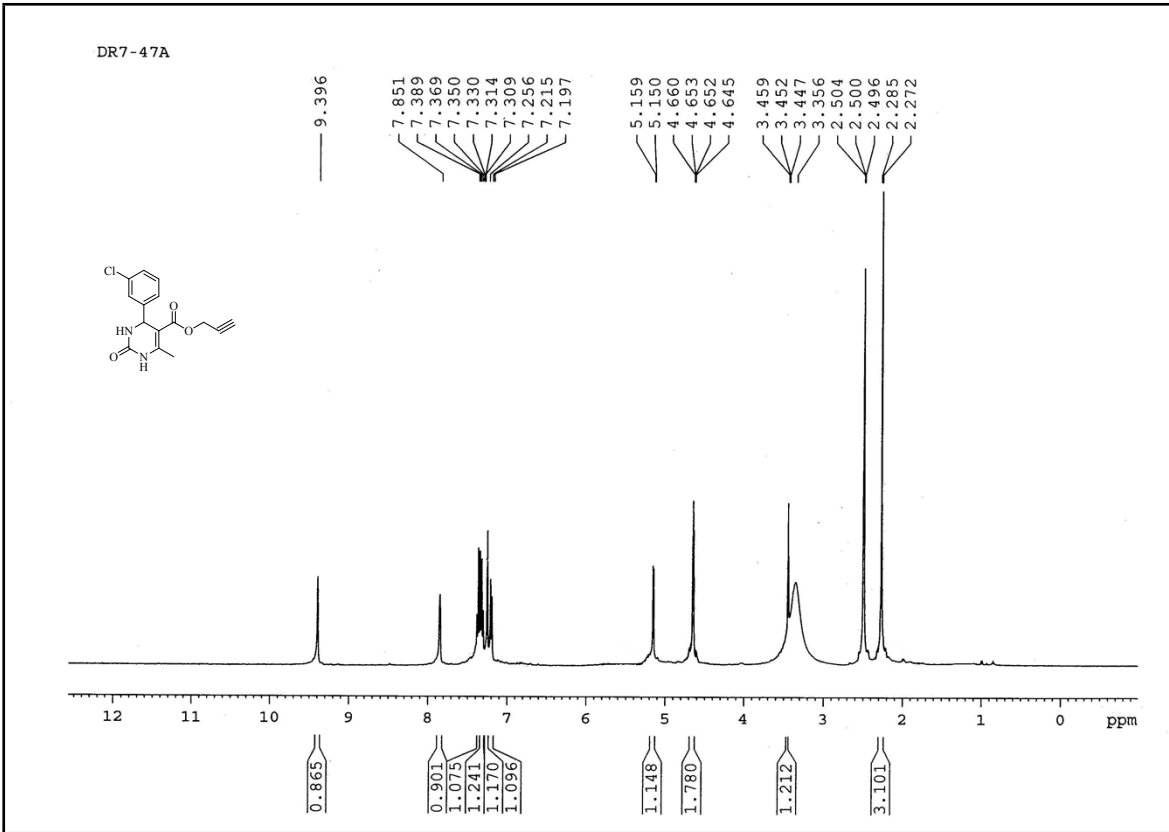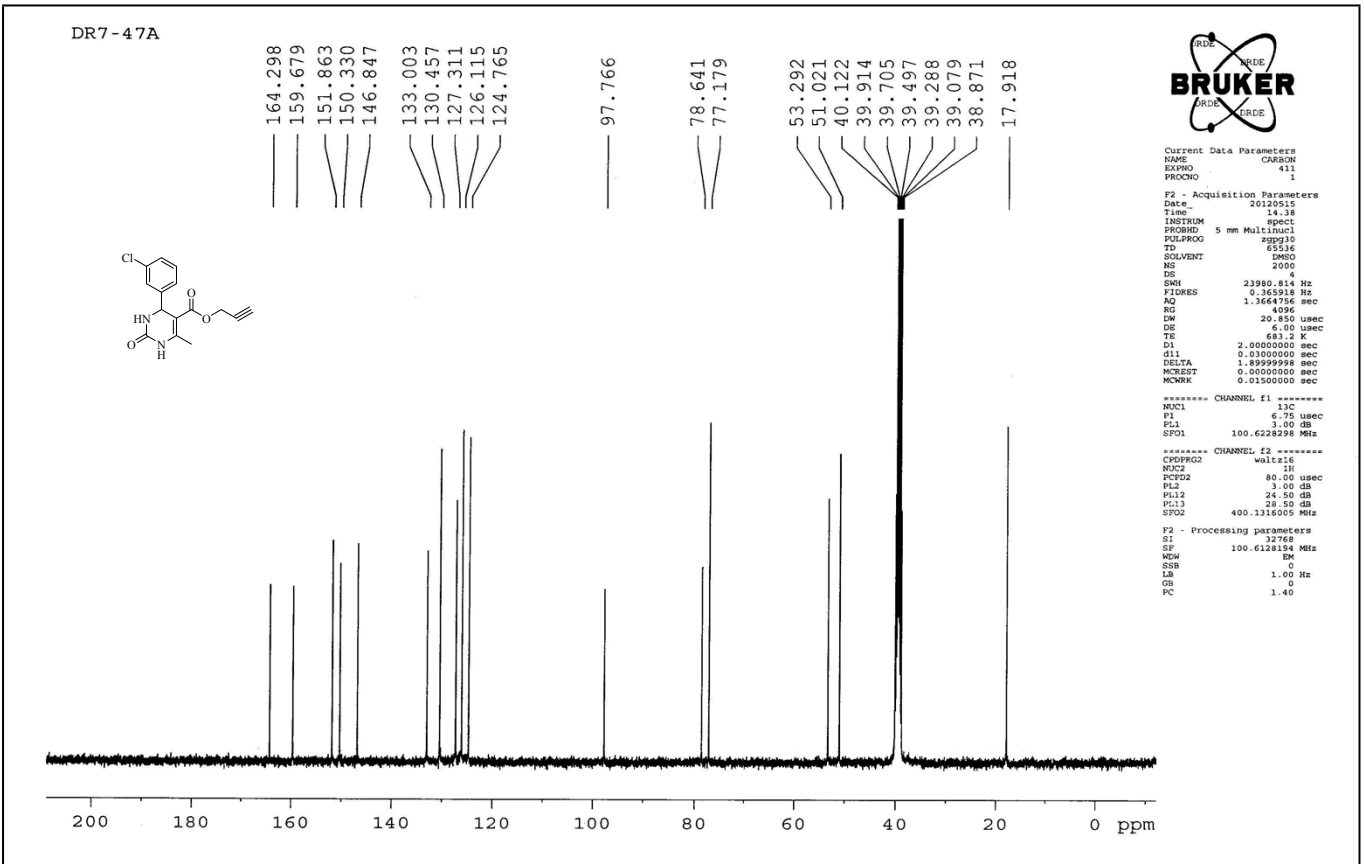



DR7-48A

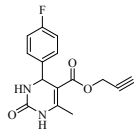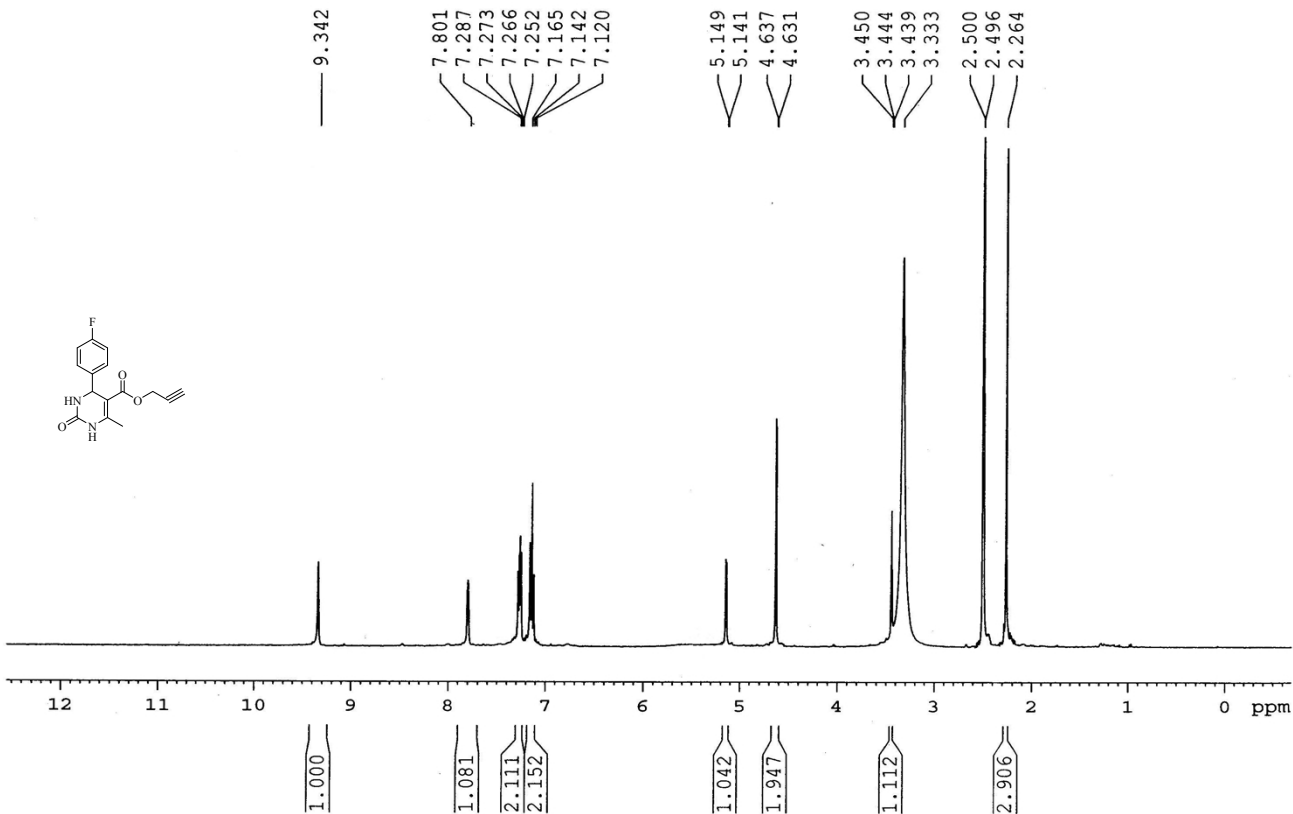

DR7-48A

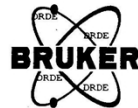

Current Data Parameters  
 NAME CARBON  
 EXPNO 41  
 PROCNO 1

F2 - Acquisition Parameters  
 Date\_ 20120211  
 Time 16.18  
 INSTRUM spect  
 PROBRD 5 mm Multinacl  
 PULPROG zgpg30  
 TD 65536  
 SOLVENT DMSO  
 NS 1000  
 DS 4  
 SWE 23980.814 Hz  
 FIDRES 0.365918 Hz  
 AQ 1.3664756 sec  
 RG 574.7  
 DM 20.850 usec  
 DE 6.80 usec  
 TE 683.0 K  
 DI 2.0000000 sec  
 d11 0.0100000 sec  
 DELTA 1.8999998 sec  
 MCXST 0.0000000 sec  
 MCXRC 0.0150000 sec

----- CHANNEL f1 -----  
 NUC1 13C  
 P1 6.75 usec  
 PL1 3.00 dB  
 SFO1 100.6228258 MHz

----- CHANNEL f2 -----  
 CPDPRG2 waltz16  
 NUC2 1H  
 PCPD2 80.00 usec  
 PL2 3.00 dB  
 PL12 24.50 dB  
 PL13 28.50 dB  
 SFO2 400.1315005 MHz

F2 - Processing parameters  
 SI 32768  
 SF 100.6128209 MHz  
 NQW SM  
 SSB 0  
 LB 1.00 Hz  
 GB 0  
 PC 1.40

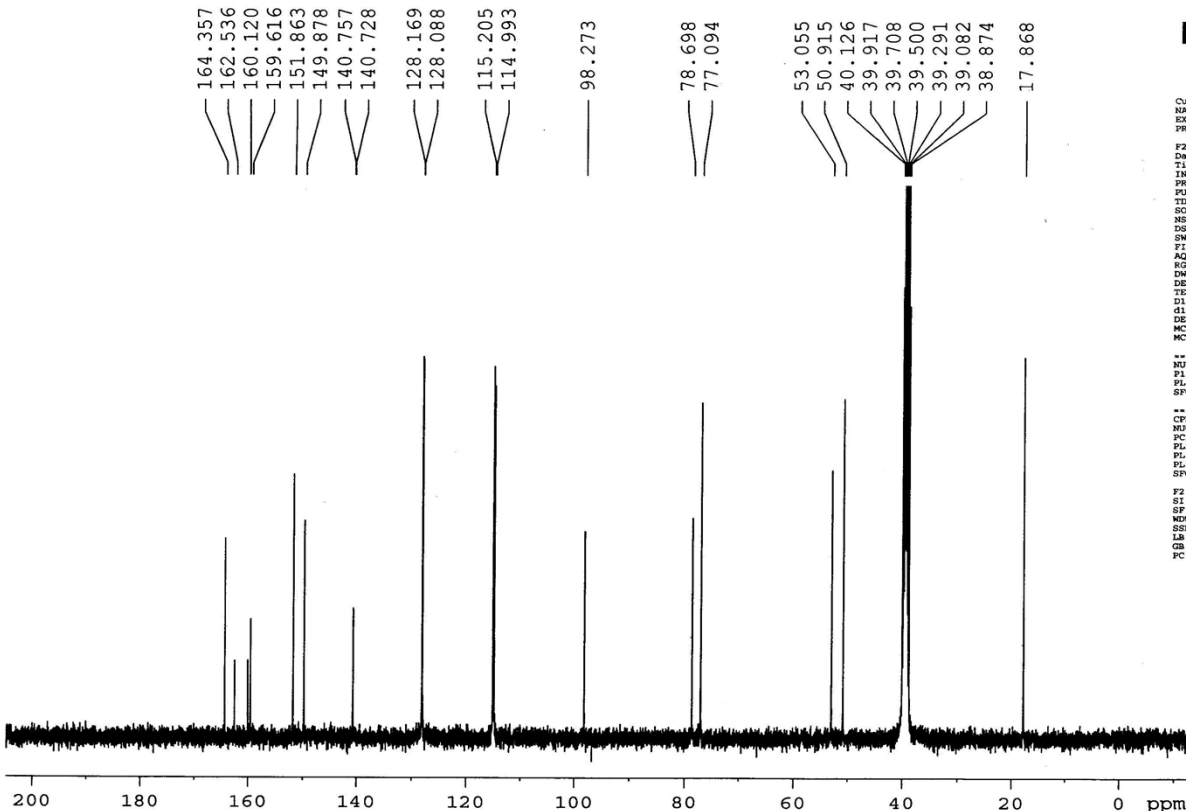

DR7-49A

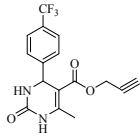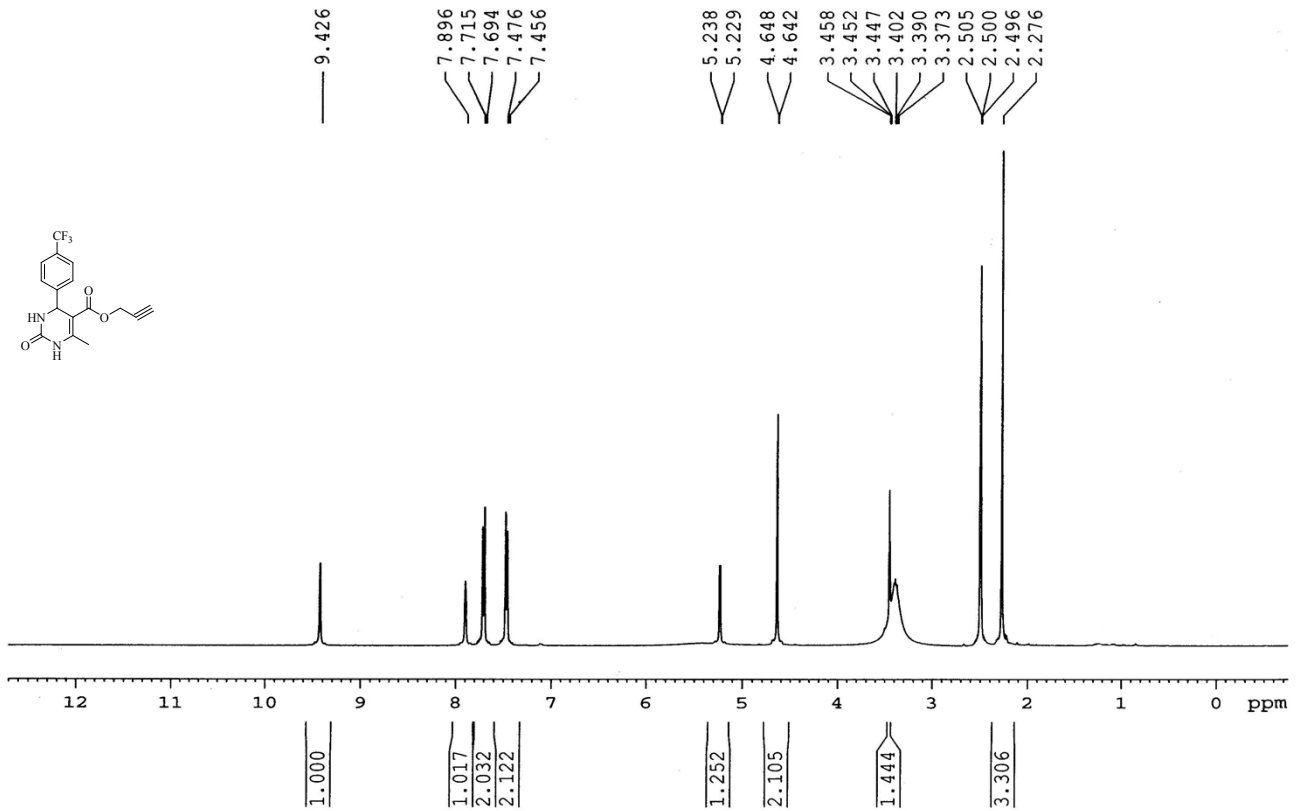

DR7-49A

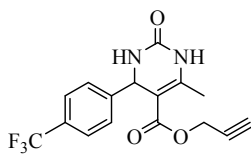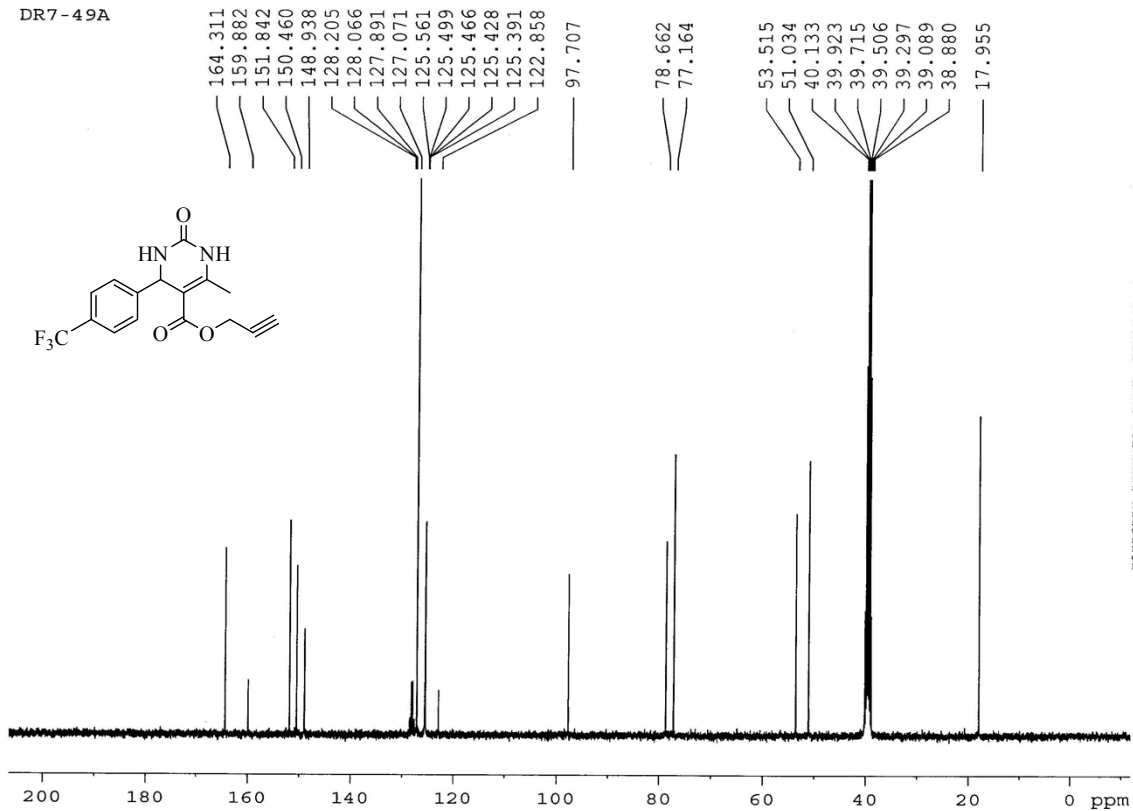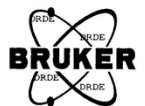

Current Data Parameters  
 NAME CARBON  
 EXPNO 422  
 PROCNO 1

F2 - Acquisition Parameters  
 Date\_ 20120523  
 Time 15.15  
 INSTRUM spect  
 PROBHD 5 mm Multinucl  
 PULPROG zgpg30  
 TD 65536  
 SOLVENT DMSO  
 NS 617  
 DS 4  
 SFO 23980.814 Hz  
 FIDRES 0.365918 Hz  
 AQ 1.3654756 sec  
 RG 4597.6  
 DM 20.850 usec  
 DE 6.00 usec  
 TE 483.2 K  
 D1 2.0000000 sec  
 d11 0.0300000 sec  
 DELTA 1.4999998 sec  
 MCREST 0.0000000 sec  
 MCWRE 0.0100000 sec

\*\*\*\*\* CHANNEL f1 \*\*\*\*\*  
 NU1 13C  
 P1 6.75 usec  
 PL1 3.00 dB  
 SFO1 100.628298 MHz

\*\*\*\*\* CHANNEL f2 \*\*\*\*\*  
 CPDPRG2 waltz16  
 NU2 1H  
 P2 80.00 usec  
 PL2 3.00 dB  
 PL12 24.50 dB  
 PL13 28.50 dB  
 SFO2 400.1316005 MHz

F2 - Processing parameters  
 SI 32768  
 SF 100.6128165 MHz  
 MDW 0  
 SSB 0  
 LB 1.00 Hz  
 GB 0  
 PC 1.40

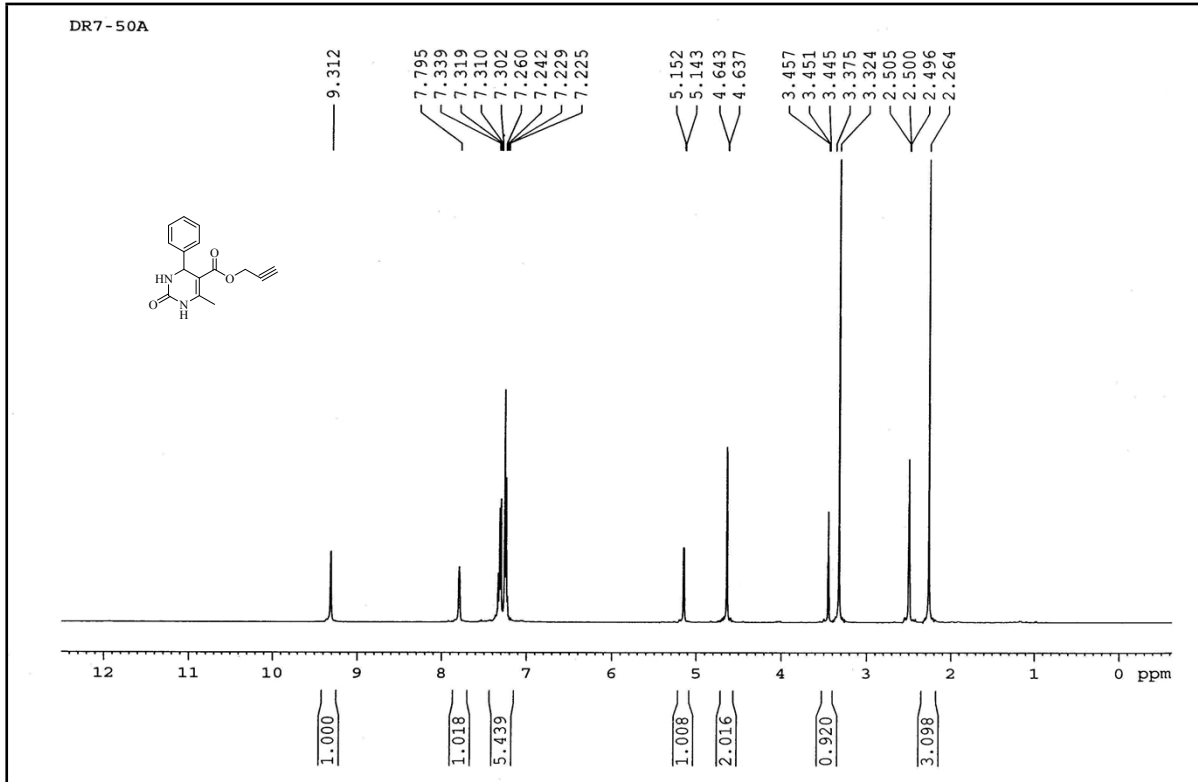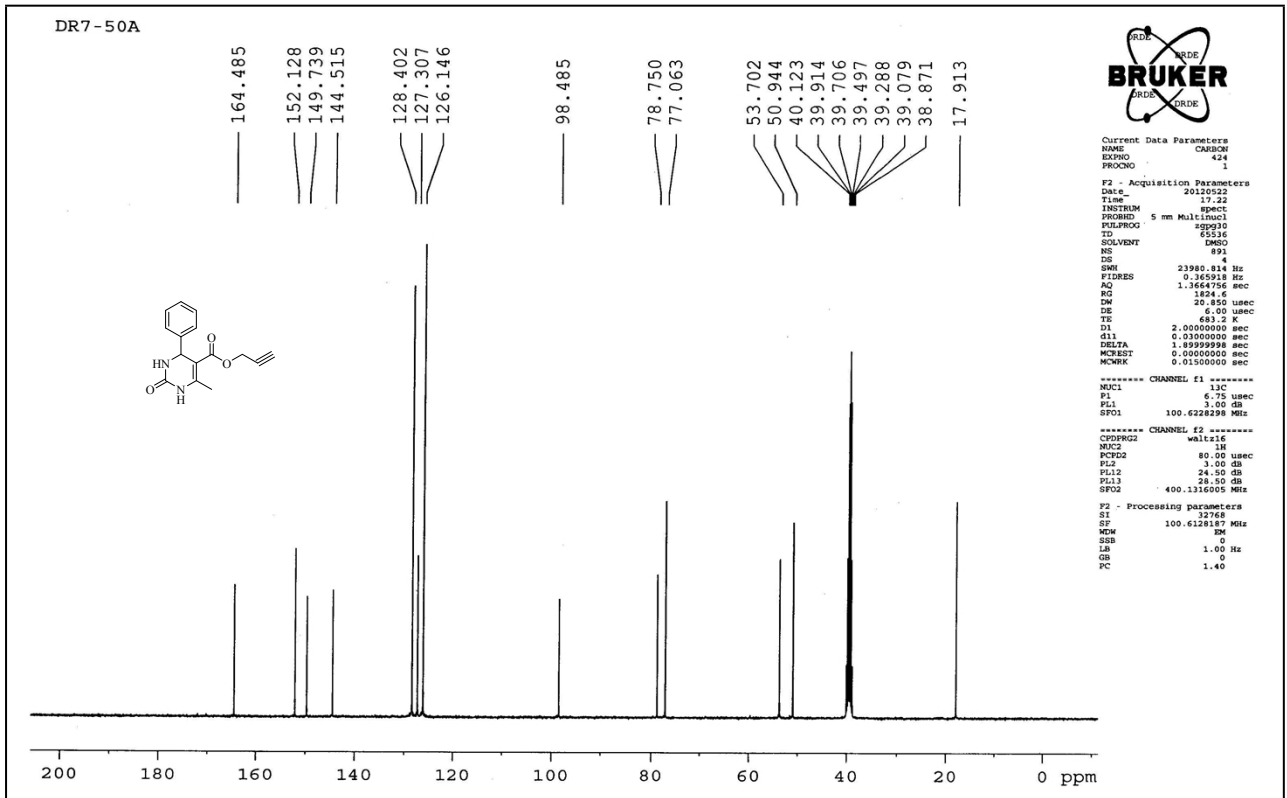

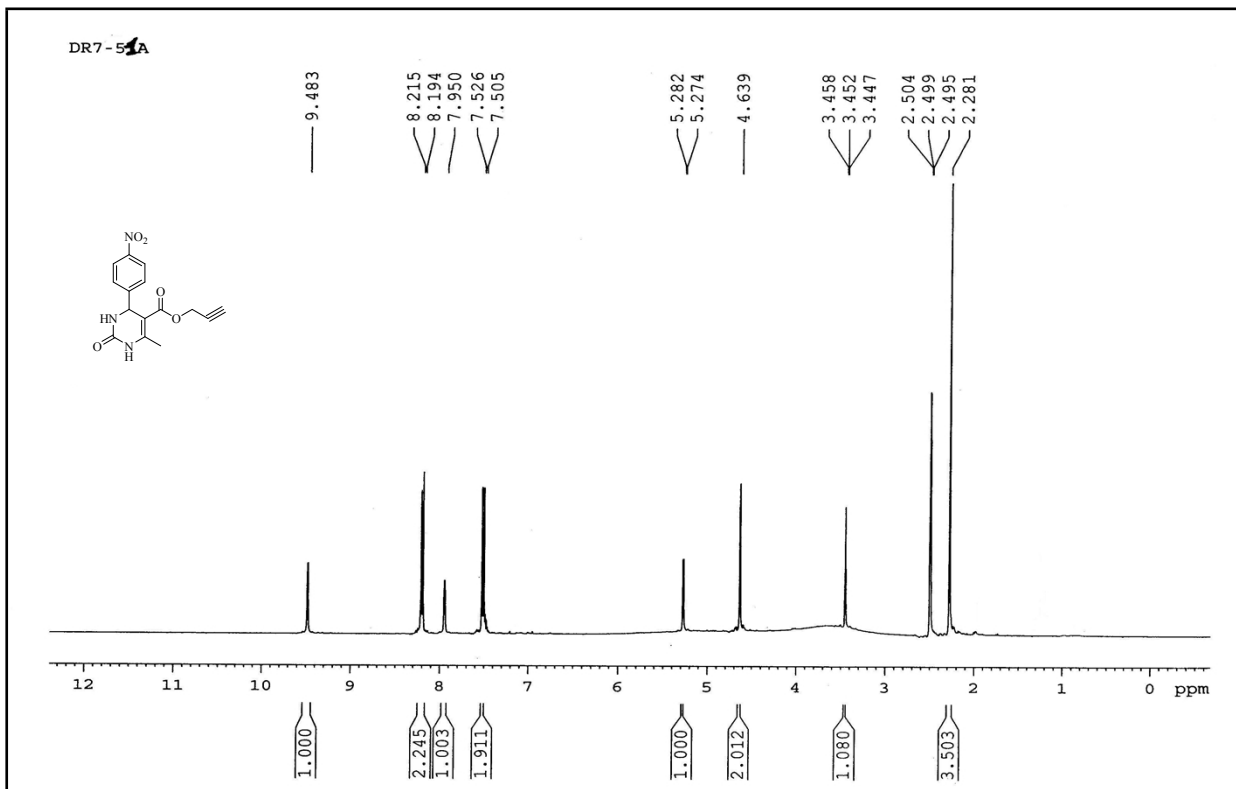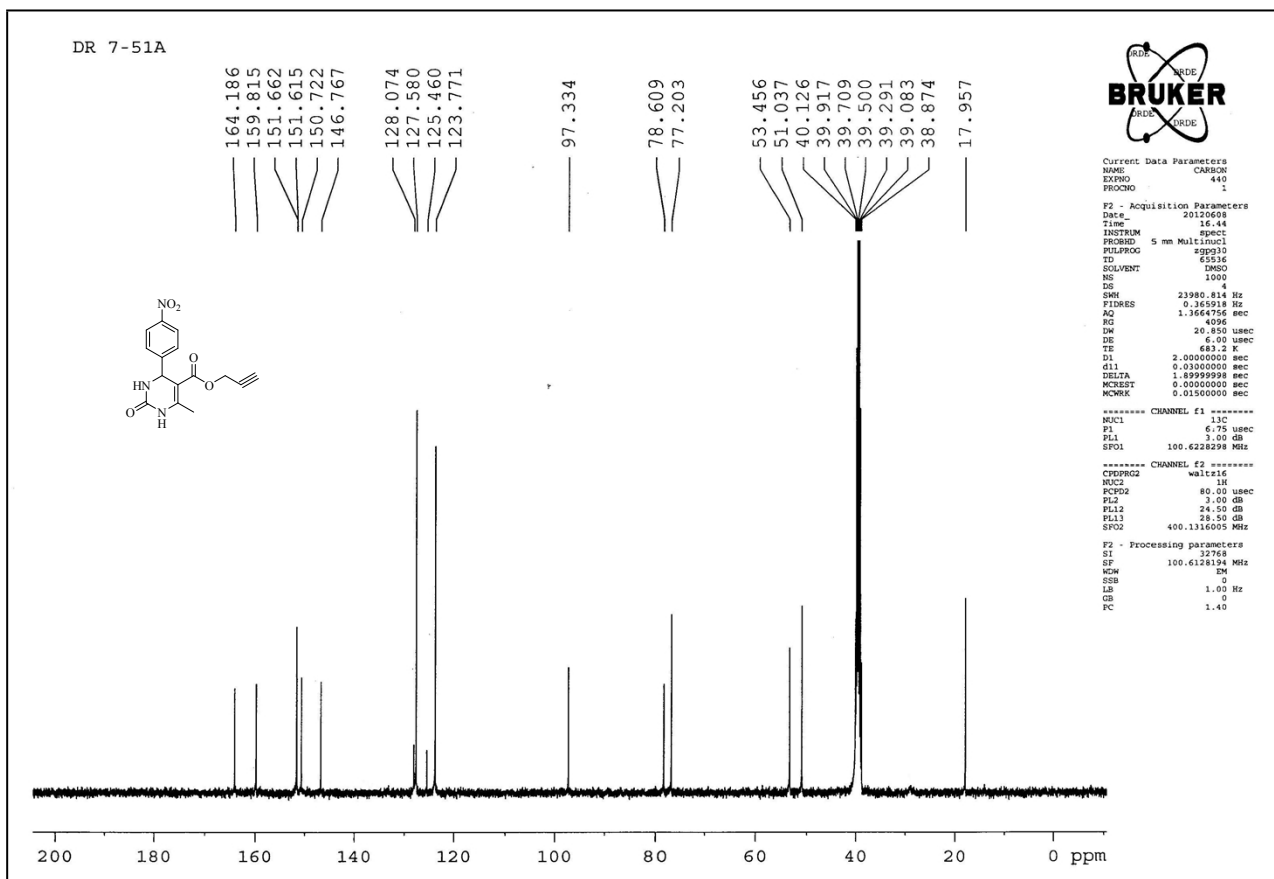

DR7-52A

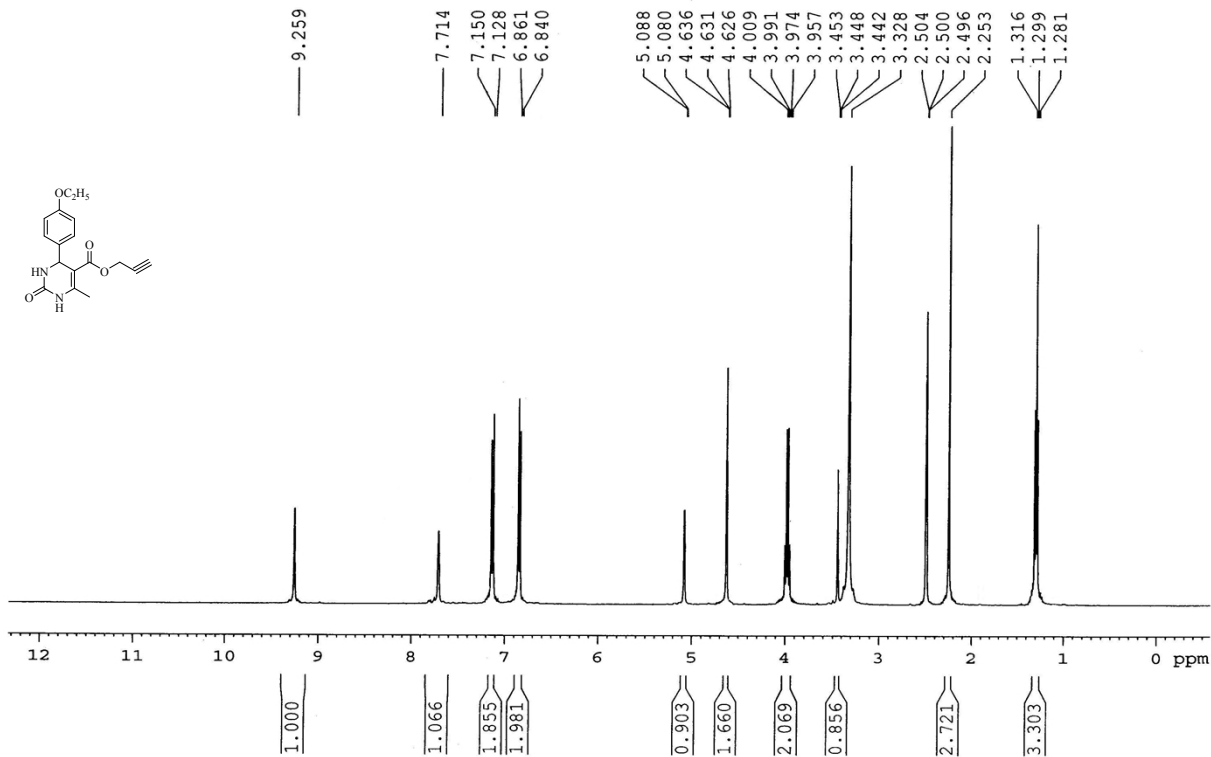

DR 7-52A

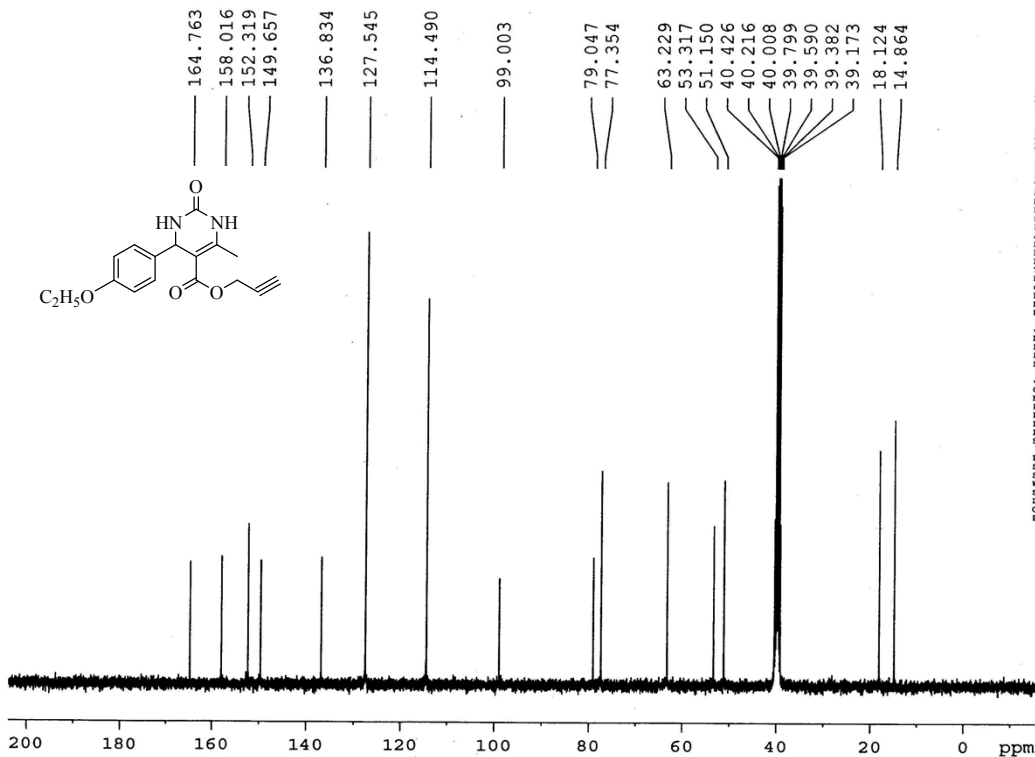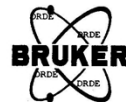

Current Data Parameters  
 NAME CARBON  
 EXPNO 430  
 PROCNO 1

F2 - Acquisition Parameters  
 Date\_ 20120311  
 Time 15.49  
 INSTRUM spect  
 PROBRW 5 mm Multinuc1  
 PULPROG zgpg30  
 TD 65536  
 FIDRES 0.355818 Hz  
 AQ 1.3664756 sec  
 RG 3225.5  
 DW 20.850 usec  
 DE 6.00 usec  
 TE 683.2 K  
 d11 2.0000000 sec  
 d12 0.0300000 sec  
 DELTA 1.8999998 sec  
 MCREST 0.0000000 sec  
 MCRST 0.0100000 sec

----- CHANNEL f1 -----  
 NUC1 13C  
 P1 6.75 usec  
 PL1 3.00 dB  
 SFO1 100.6228298 MHz

----- CHANNEL f2 -----  
 CPDPRG2 waltz16  
 NUC2 1H  
 PCPD2 80.00 usec  
 PL2 3.00 dB  
 PL12 24.50 dB  
 PL13 28.50 dB  
 SFO2 400.1316005 MHz

F2 - Processing parameters  
 SI 32768  
 SF 100.6127929 MHz  
 WDM DM  
 SSB DM  
 LB 1.00 Hz  
 GB 0  
 PC 1.40

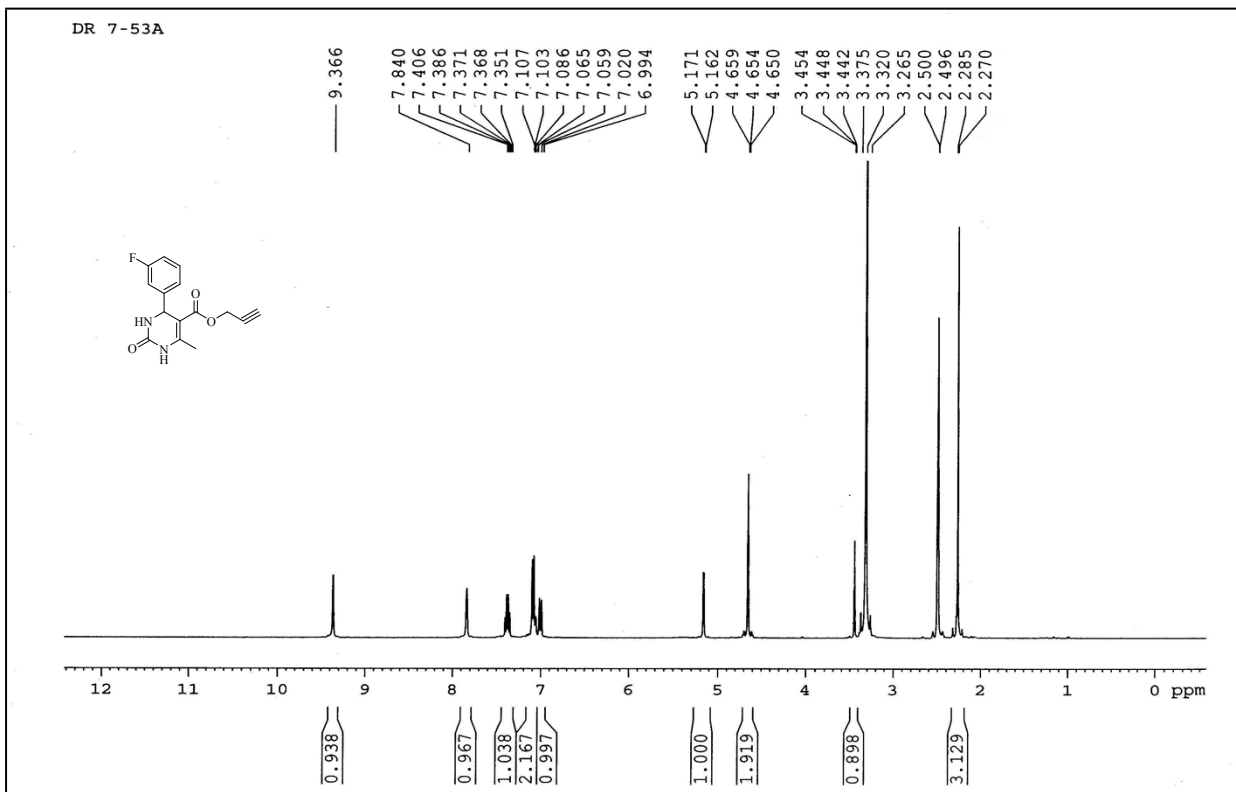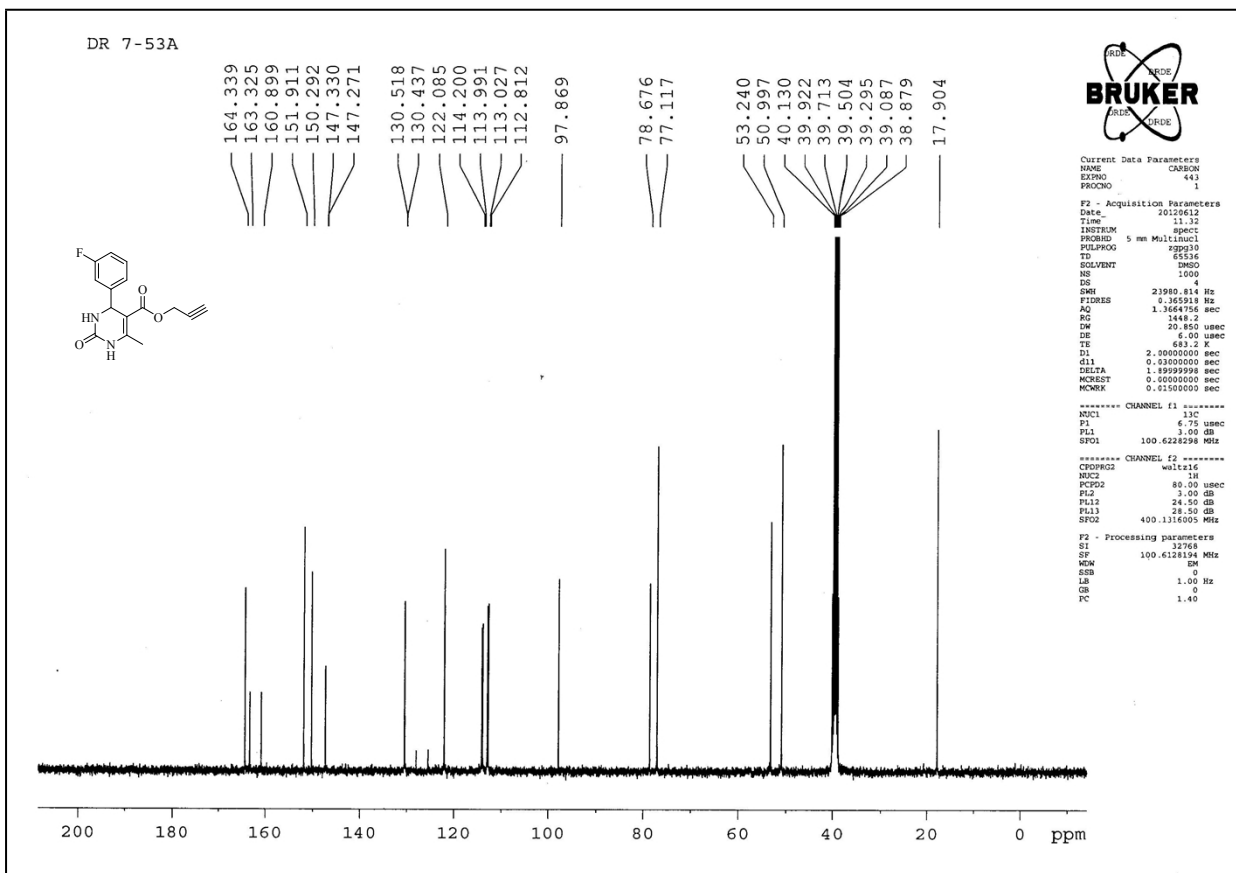

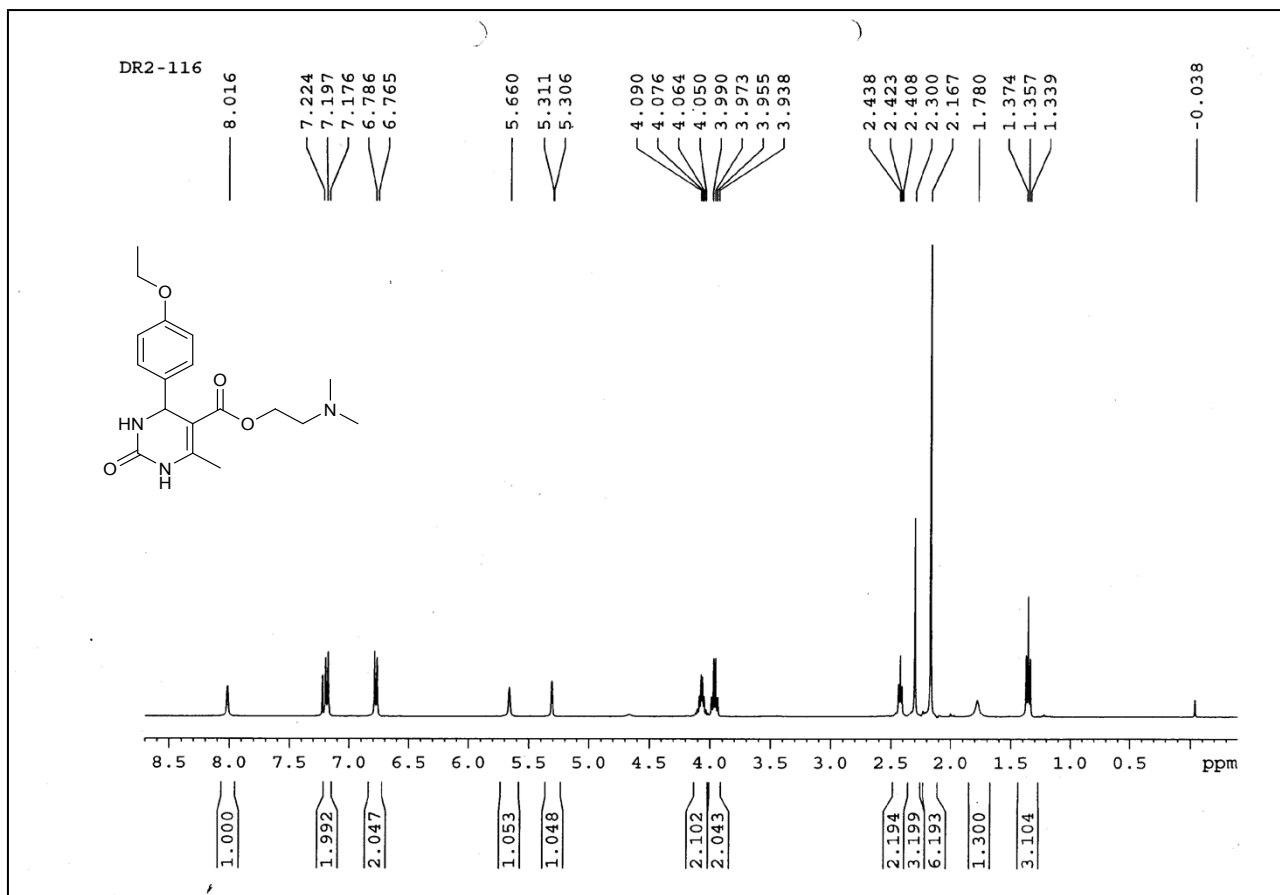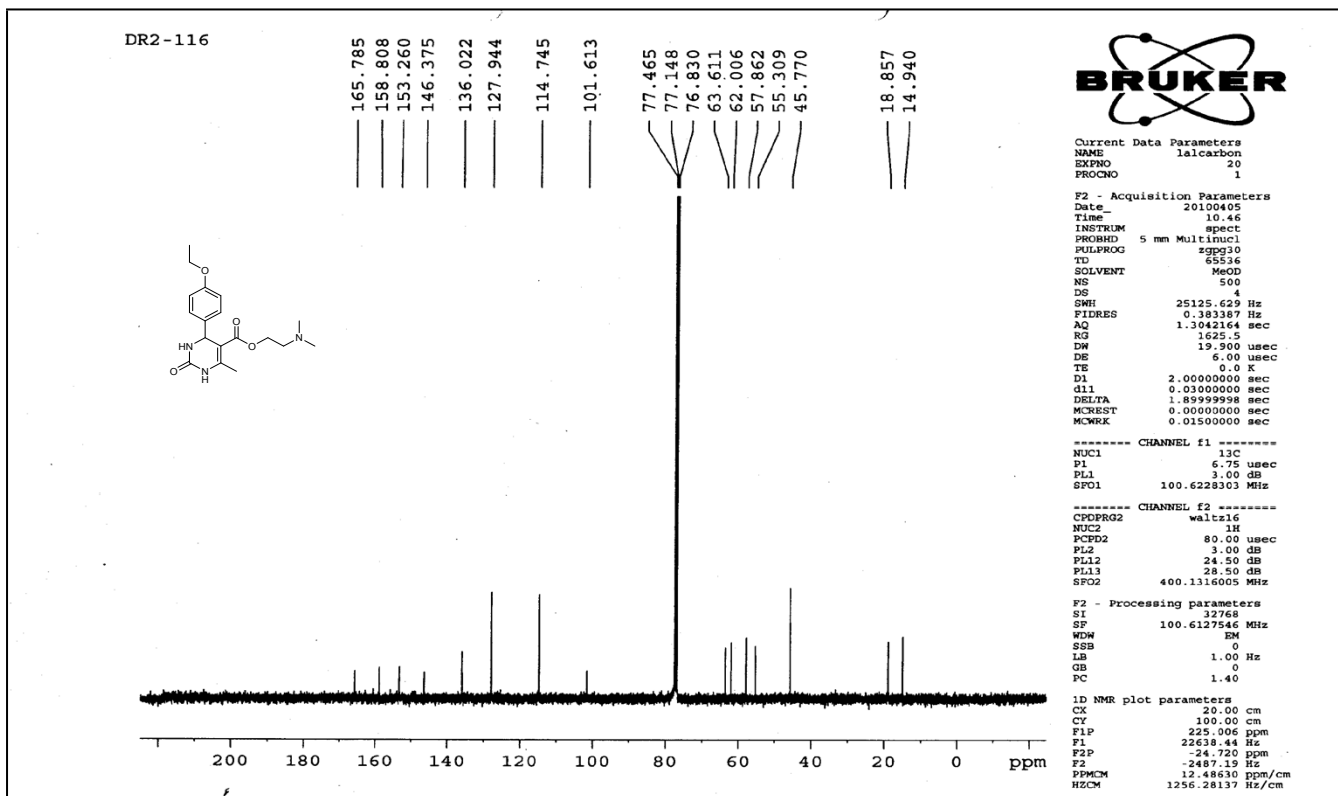

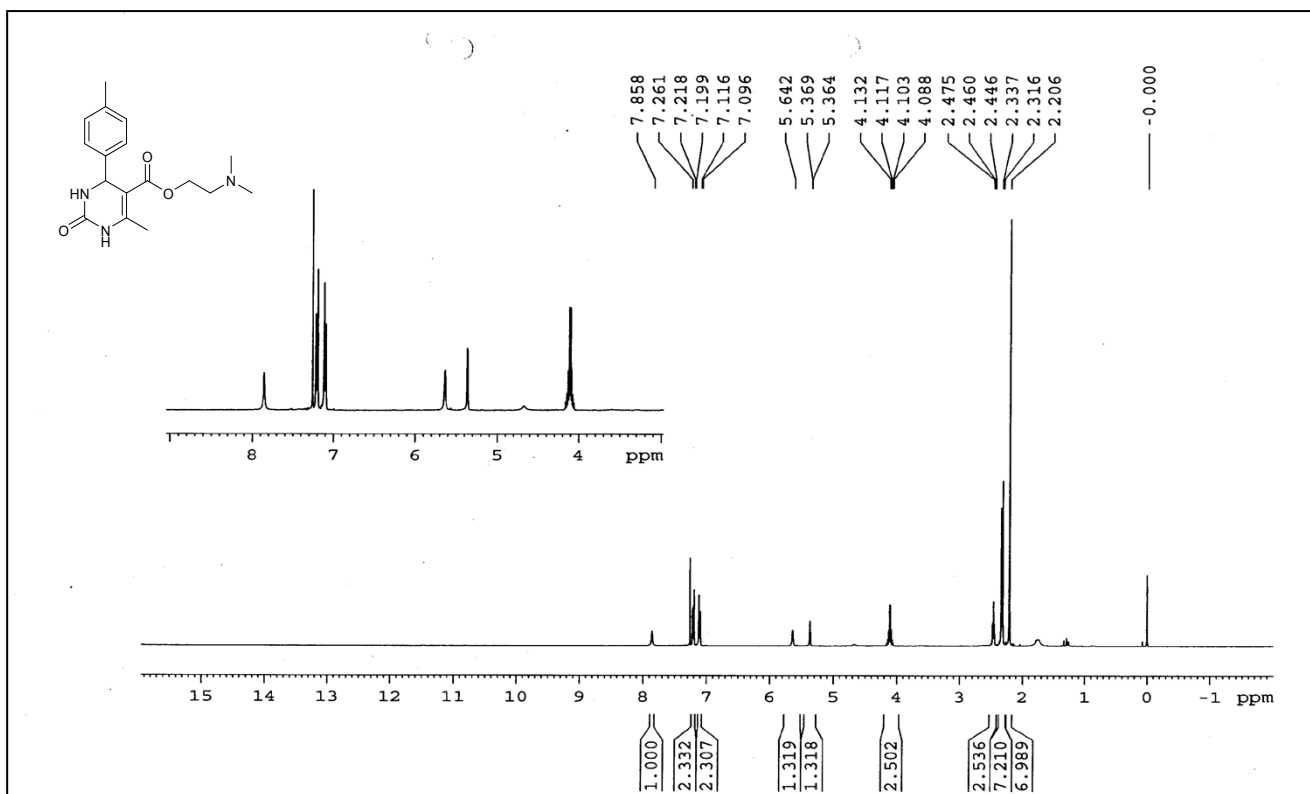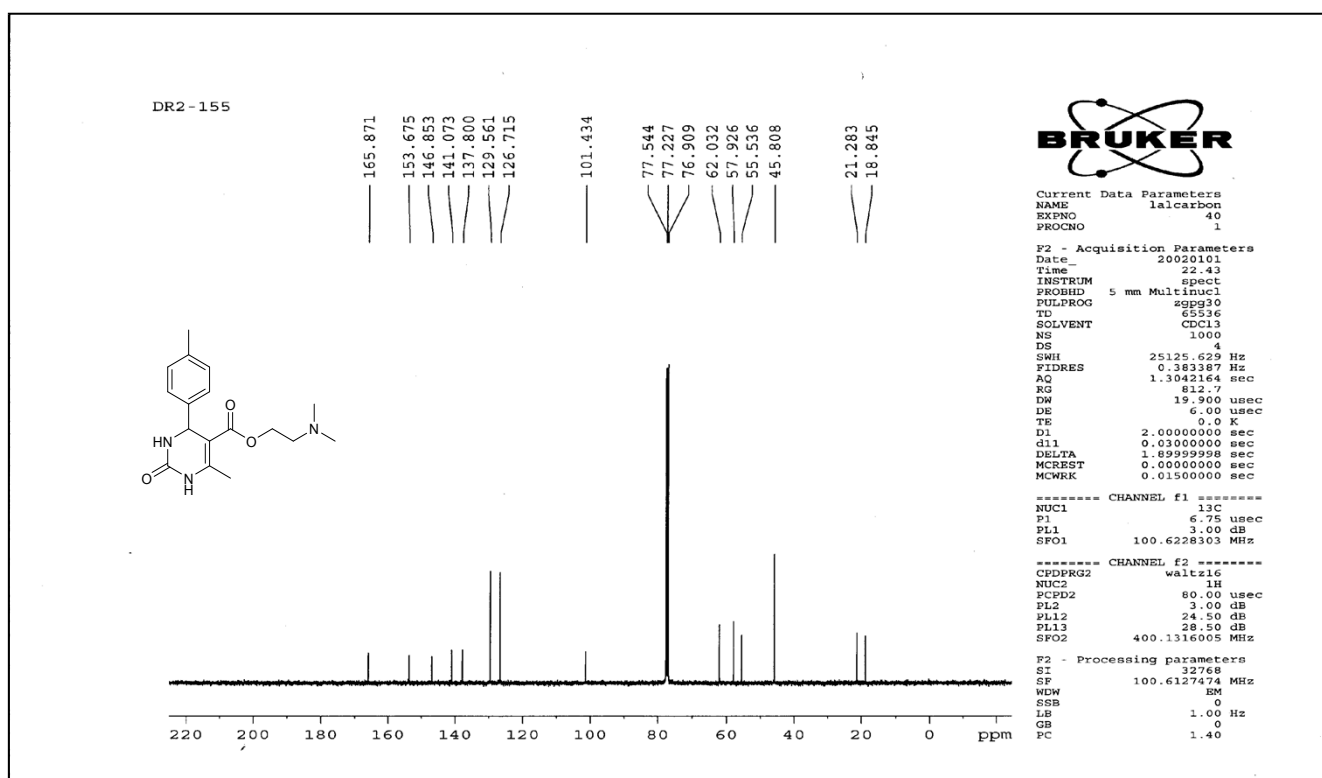

Supplement: c4ra06587e1.pdf [file c4ra06587e1.pdf]
